# Supplementary material for: Carbon nanotubes stimulate synovial inflammation by inducing systemic pro-inflammatory cytokines
Source: Royal Society of Chemistry journal article supplement (doi:10.1039/c6nr06041b), 2016-01-01
Supplement: c6nr06041b1.pdf [file c6nr06041b1.pdf]

## Supplementary Figure

### Supplementary Figure 1

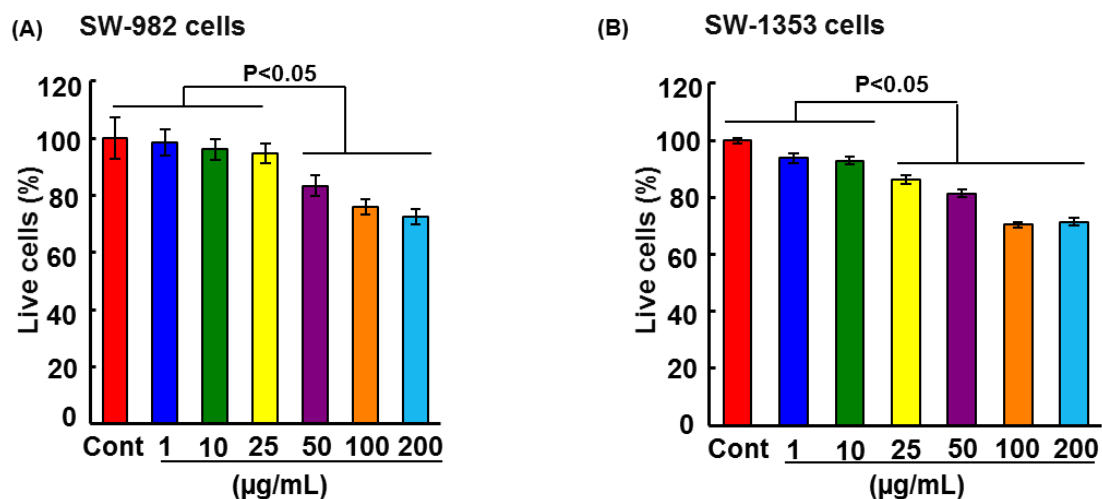

### Supplementary Figure 1

Cell viability of SW-982 cells (A) and SW-1353 cells (B) upon exposure to MWCNTs for 24 h at various concentrations determined by LIVE/DEAD Viability/Cytotoxicity assay (n=6).

**Supplementary Table 1. Primer sequences used in the current study.**

| mRNA                | Forward primer                 | Reverse primer                | Amplified fragment (nt) |
|---------------------|--------------------------------|-------------------------------|-------------------------|
| Human TNF- $\alpha$ | 5'-CAGAGGGCCTGTACCTCATC-3'     | 5'-GGAAGACCCCTCCCAGATAG-3'    | 219                     |
| Human MMP-2         | 5'-CCGTCGCCCATCATCAAGTT-3'     | 5'-CTGTCTGGGGCAGTCCAAAG-3'    | 169                     |
| Human MMP-3         | 5'-CGGTTCCGCCTGTCTCAAG-3'      | 5'-CGCCAAAAGTCCTGTCTT-3'      | 206                     |
| Human MMP-9         | 5'-GGGACGCAGACATCGTCATC-3'     | 5'-TCGTCATCGTCGAAATGGGC-3'    | 139                     |
| Human COX-1         | 5'-ACCTCGGCCACATTTATGGAGACA-3' | 5'-AGCACCTGGTACTTGAGTTTCCA-3' | 85                      |
| Human COX-2         | 5'-CTTGCTGTTCCACCCATGTCAA -3'  | 5'-TGCACTGTGTTGGAGTGGGTTTC-3' | 166                     |
| Human GAPDH         | 5'-GAAGGTGAAGGTCGGAGT-3'       | 5'-GAAGATGGTGATGGGATTTC-3'    | 226                     |
